# Supplementary material for: MiR-301b-3p promotes breast cancer development through inhibiting the expression of transforming growth factor-beta receptor 2
Source: PeerJ journal article supplement (doi:10.7717/peerj.18324), 2024-11-05
Supplement: experimental_raw_data.zip [file data analysis.xlsx]

## Sheet: Sheet1
MiR-301b-3p										MiR-301b-3p
MCF 10A			MCF 7			MDA-MB-231				MCF 10A	MCF 7	MDA-MB-231
10.15	18.35	8.2	10.18	14.54	4.36	10.11	14.39	4.28		0	-3.84	-3.92
10.17	18.98	8.81	10.13	14.22	4.09	10.12	14.17	4.05		0.61	-4.11	-4.15
10.16	18.8	8.64	10.15	14.83	4.68	10.14	14.43	4.29		0.44	-3.52	-3.91
TGFBR2										TGFBR2
MCF 10A			MCF 7			MDA-MB-231				MCF 10A	MCF 7	MDA-MB-231
10.31	12.01	1.7	10.27	15.45	5.18	10.24	15.26	5.02		0	3.48	3.32
10.31	12.08	1.77	10.28	15.79	5.51	10.21	15.51	5.3		0.07	3.81	3.6
10.32	12.45	2.13	10.25	15.85	5.6	10.29	15.24	4.95		0.43	3.9	3.25
MiR-301b-3p				TGFBR2
MCF 10A	MCF 7	MDA-MB-231		MCF 10A	MCF 7	MDA-MB-231
1	14.3204	15.1369		1	0.0896222	0.100134
0.655197	17.2677	17.7531		0.952638	0.0712977	0.0824692
0.737135	11.4716	15.0324		0.742262	0.0669858	0.105112

## Sheet: Inhibition of MIR expression
MCF 7										MCF 7
NC			MiR-301b-3p-IN			MiR-301b-3p-IN+si TGFBR2				NC	MiR-301b-3p-IN	MiR-301b-3p-IN+si TGFBR2
9.04	10.06	1.02	9.09	13.01	3.92	9.16	11.37	2.21		0	2.9	1.19
9.06	10.33	1.27	9.31	13.56	4.25	9.28	11.04	1.76		0.25	3.23	0.74
9.13	10.29	1.16	9.21	13.05	3.84	9.16	11.52	2.36		0.14	2.82	1.34
MDA-MB-231										MDA-MB-231
NC			MiR-301b-3p-IN			MiR-301b-3p-IN+si TGFBR2				NC	MiR-301b-3p-IN	MiR-301b-3p-IN+si TGFBR2
10.39	12.46	2.07	10.36	16.15	5.79	10.35	13.9	3.55		0	3.72	1.48
10.26	12.42	2.16	10.23	16.19	5.96	10.26	13.53	3.27		0.09	3.89	1.2
10.33	12.63	2.3	10.29	16.26	5.97	10.39	13.42	3.03		0.23	3.9	0.96
MCF 7					MDA-MB-231
NC	MiR-301b-3p-IN	MiR-301b-3p-IN+si TGFBR2			NC	MiR-301b-3p-IN	MiR-301b-3p-IN+si TGFBR2
1	0.133972	0.438303			1	0.0758872	0.358489
0.840896	0.106579	0.598739			0.939523	0.0674518	0.435275
0.907519	0.14161	0.395021			0.852635	0.0669858	0.514057

## Sheet: Inhibition of TGFBR2 expression
MCF 7										MCF 7
NC			MiR-301b-3p-IN			MiR-301b-3p-IN+si TGFBR2				NC	MiR-301b-3p-IN	MiR-301b-3p-IN+si TGFBR2
19.55	24.91	5.36	19.47	21.48	2.01	19.5	24.13	4.63		0	-3.35	-0.73
19.39	24.8	5.41	19.22	21.24	2.02	19.46	24.85	5.39		0.05	-3.34	0.03
19.36	24.59	5.23	19.43	21.4	1.97	19.38	24.79	5.41		-0.13	-3.39	0.05
MDA-MB-231										MDA-MB-231
NC			MiR-301b-3p-IN			MiR-301b-3p-IN+si TGFBR2				NC	MiR-301b-3p-IN	MiR-301b-3p-IN+si TGFBR2
15.98	25.64	9.66	16.69	23.03	6.34	16.38	26.16	9.78		0	-3.32	0.12
15.29	25.44	10.15	16.23	23.26	7.03	16.9	26.67	9.77		0.49	-2.63	0.11
15.56	25.7	10.14	16.4	23.24	6.84	16.67	26.26	9.59		0.48	-2.82	-0.07
MCF 7					MDA-MB-231
NC	MiR-301b-3p-IN	MiR-301b-3p-IN+si TGFBR2			NC	MiR-301b-3p-IN	MiR-301b-3p-IN+si TGFBR2
1	10.1965	1.65864			1	9.98664	0.920188
0.965936	10.1261	0.97942			0.712025	6.19026	0.926588
1.09429	10.4831	0.965936			0.716978	7.06162	1.04972

## Sheet: MCF-7 CCK8
	NC			MiR-301b-3p-IN			MiR-301b-3p-IN+si TGFBR2
0	0.133	0.124	0.142	0.138	0.122	0.149	0.128	0.119	0.127
24	0.503	0.544	0.458	0.423	0.409	0.422	0.487	0.496	0.506
48	0.887	0.947	0.991	0.719	0.686	0.797	0.868	0.937	1.019
72	1.308	1.186	1.061	0.954	0.936	1.001	1.11	1.218	1.162

## Sheet: MDA-MB-231 CCK8
	NC			MiR-301b-3p-IN			MiR-301b-3p-IN+si TGFBR2
0	0.135	0.133	0.127	0.124	0.123	0.126	0.122	0.138	0.136
24	0.504	0.519	0.541	0.373	0.451	0.336	0.464	0.482	0.523
48	0.956	0.996	1.075	0.788	0.853	0.719	1.077	0.912	0.975
72	1.379	1.235	1.167	0.955	0.869	0.841	1.292	1.127	1.273

## Sheet: Cell Numbers-MCF-7
	NC			MiR-301b-3p-IN			MiR-301b-3p-IN+si-TGFBR2
Invasion	37	48	36	6	11	7	36	43	34
Migration	63	59	49	11	12	9	45	41	51

## Sheet: Cell Numbers-MDA-231
	NC			MiR-301b-3p-IN			MiR-301b-3p-IN+si-TGFBR2
Invasion	36	28	29	2	8	7	34	47	36
Migration	57	47	40	12	8	10	48	38	41

## Sheet: wound healing
	NC			MiR-301b-3p-IN			MiR-301b-3p-IN+si-TGFBR2
MCF-7	70.28	68.23	76.03	46.33	54.59	58.06	72.8	70.33	69.21
MDA-MB-231	77.64	73.46	68.88	45.89	40.07	51.9	74.64	68.75	71.05

## Sheet: apoptosis
MCF-7
NC	MiR-301b-3p-IN	MiR-301b-3p-IN+si-TGFBR2
0.71	7.05	0.638
0	5.79	0.12
0.478	7.44	1.33
MDA-MB-231
NC	MiR-301b-3p-IN	MiR-301b-3p-IN+si-TGFBR2
0.166	7.46	0.6
0.37	5.08	0.178
0.159	11.75	0.36
		s

## Sheet: WB
	NC			MiR-301b-3p-IN			MiR-301b-3p-IN+si-TGFBR2
P-STAT1/STAT1	0.408	0.318	0.495	0.793	0.851	0.928	0.344	0.315	0.408
P-STAT3/STAT3	0.405	0.453	0.358	0.725	0.712	0.866	0.443	0.449	0.405
P-STAT6/STAT6	0.964	0.732	0.846	0.484	0.375	0.419	0.791	0.806	0.801
