# Supplementary material for: MiR-301b-3p promotes breast cancer development through inhibiting the expression of transforming growth factor-beta receptor 2
Source: PeerJ. 2024 Nov 5;12:e18324. doi: 10.7717/peerj.18324 (PMC11546148; doi:10.7717/peerj.18324)
Supplement: Supplemental Information 2 [file peerj-12-18324-s002.xls]

## Sheet: Sheet1
ITEM TO CHECK	IMPORTANCE	CHECKLIST
EXPERIMENTAL DESIGN
Definition of experimental and control groups	E	page7line136-137
Number within each group	E	page7line136-140
Assay carried out by core lab or investigator's lab?	D	Not Applicable
Acknowledgement of authors' contributions	D	Not Applicable
SAMPLE
Description	E	page7-8line150-162
Volume/mass of sample processed	D	page7-8line150-162
Microdissection or macrodissection	E	page7-8line150-162
Processing procedure	E	page7-8line150-162
If frozen - how and how quickly?	E	page7-8line150-162
If fixed - with what, how quickly?	E	page7-8line150-162
Sample storage conditions and duration (especially for FFPE samples)	E	page7-8line150-162
NUCLEIC ACID EXTRACTION
Procedure and/or instrumentation	E	page7-8line150-162
Name of kit and details of any modifications	E	page7-8line150-162
Source of additional reagents used	D	Not Applicable
Details of DNase or RNAse treatment	E	page7-8line150-162
Contamination assessment (DNA or RNA)	E	page7-8line150-162
Nucleic acid quantification	E	page7-8line150-162
Instrument and method	E	page7-8line150-162
Purity (A260/A280)	D	Not Applicable
Yield	D	Not Applicable
RNA integrity method/instrument	E	page7-8line150-162
RIN/RQI or Cq of 3' and 5' transcripts	E	page7-8line150-162
Electrophoresis traces	D	Not Applicable
Inhibition testing (Cq dilutions, spike or other)	E	page7-8line150-162
REVERSE TRANSCRIPTION
Complete reaction conditions	E	page7-8line150-162
Amount of RNA and reaction volume	E	page7-8line150-162
Priming oligonucleotide (if using GSP) and concentration	E	page7-8line150-162
Reverse transcriptase and concentration	E	page7-8line150-162
Temperature and time	E	page7-8line150-162
Manufacturer of reagents and catalogue numbers	D	Not Applicable
Cqs with and without RT	D*	Not Applicable
Storage conditions of cDNA	D	Not Applicable
qPCR TARGET INFORMATION
If multiplex, efficiency and LOD of each assay.	E	page7-8line150-162
Sequence accession number	E	page7-8line150-162
Location of amplicon	D	Not Applicable
Amplicon length	E	page7-8line150-162
In silico specificity screen (BLAST, etc)	E	page7-8line150-162
Pseudogenes, retropseudogenes or other homologs?	D	Not Applicable
Sequence alignment	D	Not Applicable
Secondary structure analysis of amplicon	D	Not Applicable
Location of each primer by exon or intron (if applicable)	E	page7-8line150-162
What splice variants are targeted?	E	page7-8line150-162
qPCR OLIGONUCLEOTIDES
Primer sequences	E	page7-8line150-162
RTPrimerDB Identification Number	D	Not Applicable
Probe sequences	D**	Not Applicable
Location and identity of any modifications	E	page7-8line150-162
Manufacturer of oligonucleotides	D	Not Applicable
Purification method	D	Not Applicable
qPCR PROTOCOL
Complete reaction conditions	E	page7-8line150-162
Reaction volume and amount of cDNA/DNA	E	page7-8line150-162
Primer, (probe), Mg++ and dNTP concentrations	E	page7-8line150-162
Polymerase identity and concentration	E	page7-8line150-162
Buffer/kit identity and manufacturer	E	page7-8line150-162
Exact chemical constitution of the buffer	D	Not Applicable
Additives (SYBR Green I, DMSO, etc.)	E	page7-8line150-162
Manufacturer of plates/tubes and catalog number	D	Not Applicable
Complete thermocycling parameters	E	page7-8line150-162
Reaction setup (manual/robotic)	D	Not Applicable
Manufacturer of qPCR instrument	E	page7-8line150-162
qPCR VALIDATION
Evidence of optimisation (from gradients)	D	Not Applicable
Specificity (gel, sequence, melt, or digest)	E	page7-8line150-162
For SYBR Green I, Cq of the NTC	E	page7-8line150-162
Standard curves with slope and y-intercept	E	page7-8line150-162
PCR efficiency calculated from slope	E	page7-8line150-162
Confidence interval for PCR efficiency or standard error	D	Not Applicable
r2 of standard curve	E	page7-8line150-162
Linear dynamic range	E	page7-8line150-162
Cq variation at lower limit	E	page7-8line150-162
Confidence intervals throughout range	D	Not Applicable
Evidence for limit of detection	E	page7-8line150-162
If multiplex, efficiency and LOD of each assay.	E	page7-8line150-162
DATA ANALYSIS
qPCR analysis program (source, version)	E	page7-8line150-162
Cq method determination	E	page7-8line150-162
Outlier identification and disposition	E	page7-8line150-162
Results of NTCs	E	page7-8line150-162
Justification of number and choice of reference genes	E	page7-8line150-162
Description of normalisation method	E	page7-8line150-162
Number and concordance of biological replicates	D	Not Applicable
Number and stage (RT or qPCR) of technical replicates	E	page7-8line150-162
Repeatability (intra-assay variation)	E	page7-8line150-162
Reproducibility (inter-assay variation, %CV)	D	Not Applicable
Power analysis	D	Not Applicable
Statistical methods for result significance	E	page7-8line150-162
Software (source, version)	E	page7-8line150-162
Cq or raw data submission using RDML	D	Not Applicable
Table 1. MIQE checklist for authors, reviewers and editors. All essential information (E) must be submitted with the manuscript. Desirable
information (D) should be submitted if available. If using primers obtained from RTPrimerDB, information on qPCR target, oligonucleotides,
protocols and validation is available from that source.
*: Assessing the absence of DNA using a no RT assay is essential when first extracting RNA. Once the sample has been validated as
RDNA-free, inclusion of a no-RT control is desirable, but no longer essential.
**: Disclosure of the probe sequence is highly desirable and strongly encouraged. However, since not all commercial pre-designed assay
vendors provide this information, it cannot be an essential requirement. Use of such assays is advised against.
