# Supplementary figures and images for: MiR-301b-3p promotes breast cancer development through inhibiting the expression of transforming growth factor-beta receptor 2
Source: PeerJ journal article supplement (doi:10.7717/peerj.18324), 2024-11-05

|                |   |   |   |
|----------------|---|---|---|
| miR-301b-3p-IN | - | + | + |
| si TGFR2       | - | - | + |

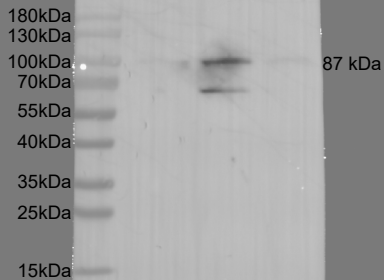

Supplement: STAT1.zip [file pstat1+stat1 1_1(Composite).pdf › pstat1+stat1 1_1(Composite).pdf]

|                    |   |   |   |
|--------------------|---|---|---|
| miR-301b-3p-IN     | - | + | + |
| si TGFB $\beta$ R2 | - | - | + |

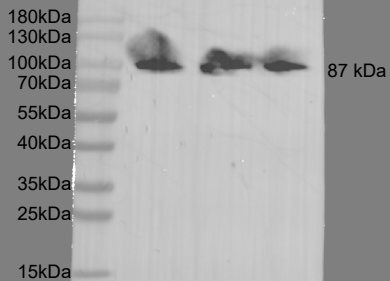

Supplement: STAT1.zip [file pstat1+stat1 1_2(Composite).pdf › pstat1+stat1 1_2(Composite).pdf]

|                |   |   |   |
|----------------|---|---|---|
| miR-301b-3p-IN | - | + | + |
| si TGFBR2      | - | - | + |

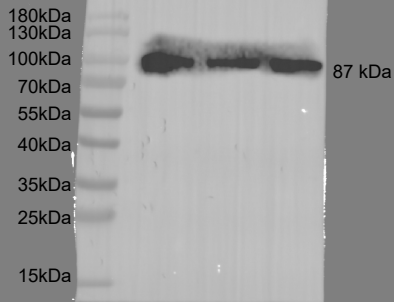

Supplement: STAT1.zip [file pstat1+stat1 2_1(Composite).pdf › pstat1+stat1 2_1(Composite).pdf]

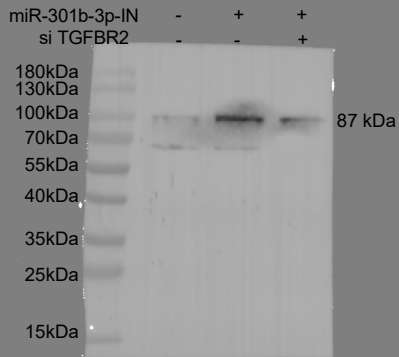

Supplement: STAT1.zip [file pstat1+stat1 2_2(Composite).pdf › pstat1+stat1 2_2(Composite).pdf]

miR-301b-3p-IN

-

+

+

si TGFB $\beta$ 2

-

-

+

180kDa

130kDa

100kDa

70kDa

55kDa

40kDa

35kDa

25kDa

15kDa

87 kDa

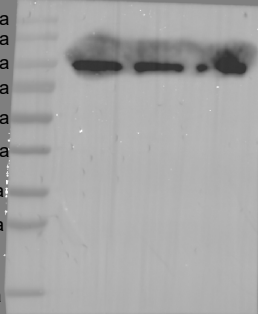

Supplement: STAT1.zip [file pstat1+stat1 3_1(Composite).pdf › pstat1+stat1 3_1(Composite).pdf]

|                |   |   |   |
|----------------|---|---|---|
| miR-301b-3p-IN | - | + | + |
| si TGFR2       | - | - | + |

180kDa  
130kDa  
100kDa  
70kDa  
55kDa  
40kDa  
35kDa  
25kDa  
15kDa

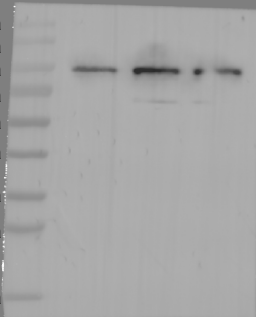

87 kDa

Supplement: STAT1.zip [file pstat1+stat1 3_2(Composite).pdf › pstat1+stat1 3_2(Composite).pdf]

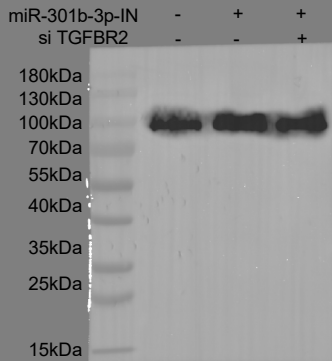

Supplement: STAT3.zip [file pstat3+stat3 1_1(Composite).pdf › pstat3+stat3 1_1(Composite).pdf]

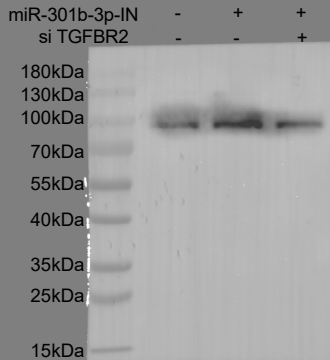

88 kDa

Supplement: STAT3.zip [file pstat3+stat3 1_2(Composite).pdf › pstat3+stat3 1_2(Composite).pdf]

|                |   |   |   |
|----------------|---|---|---|
| miR-301b-3p-IN | - | + | + |
| si TGFR2       | - | - | + |

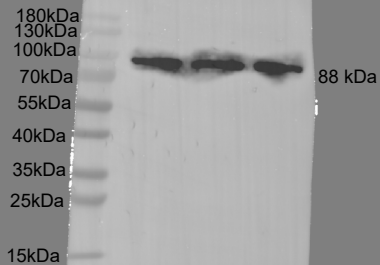

Supplement: STAT3.zip [file pstat3+stat3 2_1(Composite).pdf › pstat3+stat3 2_1(Composite).pdf]

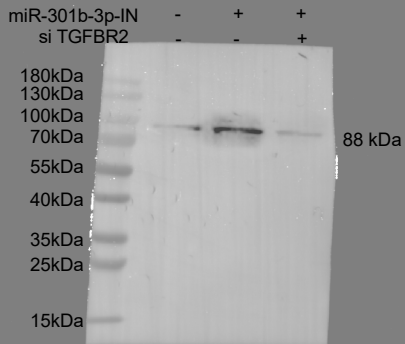

Supplement: STAT3.zip [file pstat3+stat3 2_2(Composite).pdf › pstat3+stat3 2_2(Composite).pdf]

|                |   |   |   |
|----------------|---|---|---|
| miR-301b-3p-IN | - | + | + |
| si TGFBR2      | - | - | + |

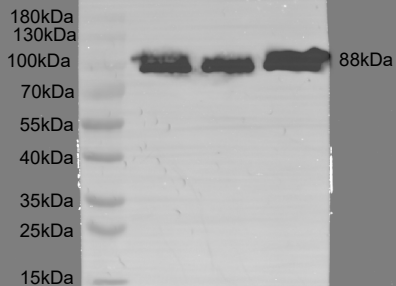

Supplement: STAT3.zip [file pstat3+stst3 3_1(Composite).pdf › pstat3+stst3 3_1(Composite).pdf]

|                |   |   |   |
|----------------|---|---|---|
| miR-301b-3p-IN | - | + | + |
| si TGFBR2      | - | - | + |

180kDa  
130kDa  
100kDa  
70kDa  
55kDa  
40kDa  
35kDa  
25kDa  
15kDa

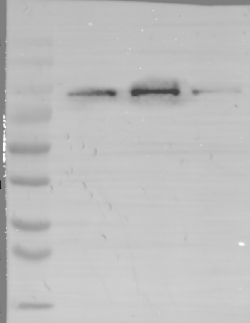

88kDa

Supplement: STAT3.zip [file pstat3+stst3 3_2(Composite).pdf › pstat3+stst3 3_2(Composite).pdf]

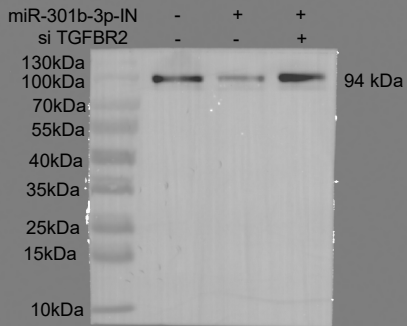

Supplement: STAT6.zip [file pstat6+stat6 1_1(Composite).pdf › pstat6+stat6 1_1(Composite).pdf]

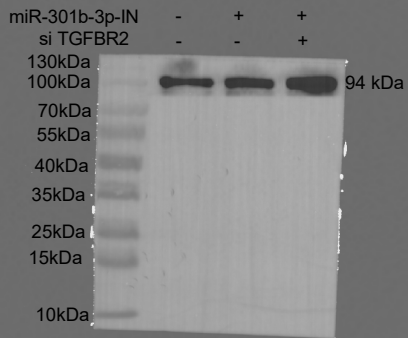

Supplement: STAT6.zip [file pstat6+stat6 1_2(Composite).pdf › pstat6+stat6 1_2(Composite).pdf]

|                |   |   |   |
|----------------|---|---|---|
| miR-301b-3p-IN | - | + | + |
| si TGFBR2      | - | - | + |

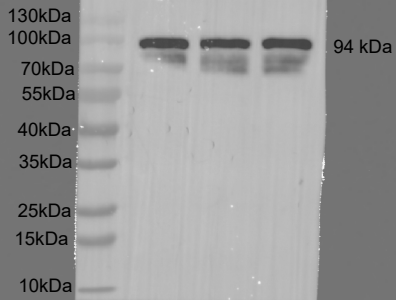

Supplement: STAT6.zip [file pstat6+stat6 2_1(Composite).pdf › pstat6+stat6 2_1(Composite).pdf]

|                |   |   |   |
|----------------|---|---|---|
| miR-301b-3p-IN | - | + | + |
| si TGFBR2      | - | - | + |

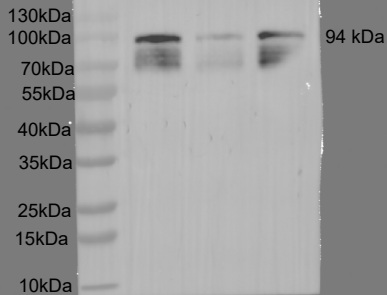

Supplement: STAT6.zip [file pstat6+stat6 2_2(Composite).pdf › pstat6+stat6 2_2(Composite).pdf]

|                |   |   |   |
|----------------|---|---|---|
| miR-301b-3p-IN | - | + | + |
| si TGFR2       | - | - | + |

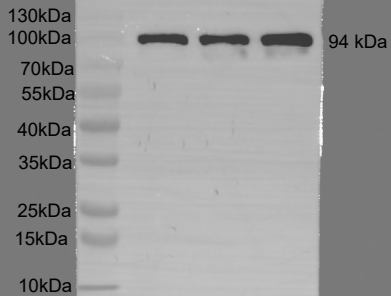

Supplement: STAT6.zip [file pstat6+stat6 3_1(Composite).pdf › pstat6+stat6 3_1(Composite).pdf]

|                        |   |   |   |
|------------------------|---|---|---|
| miR-301b-3p-IN         | - | + | + |
| si TGFB <sup>R</sup> 2 | - | - | + |

130kDa

100kDa

70kDa

55kDa

40kDa

35kDa

25kDa

15kDa

10kDa

94 kDa

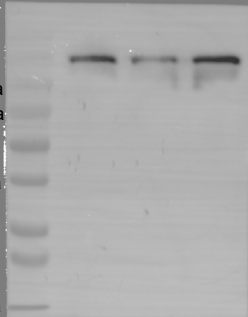

Supplement: STAT6.zip [file pstat6+stat6 3_2(Composite).pdf › pstat6+stat6 3_2(Composite).pdf]
